# Supplementary material
Source: Springer Nature journal article supplement (https://www.springermedizin.de/resource/supplementary/12885_2006_556_MOESM3_ESM.pdf/9469762)

**A** DU145

DCPA

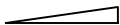

75 150

HIF-1 $\alpha$

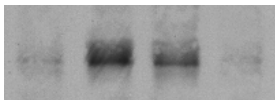

HIF-1 $\beta$

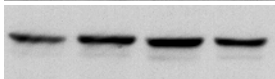

Serum

- + + +

**B** PC-3

DCPA

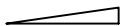

75 150

HIF-1 $\alpha$

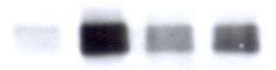

HIF-1 $\beta$

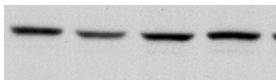

Serum

- + + +

Supplement: MOESM3 [file 9469762]
